# Supplementary material for: Triazole-rich 3D metal–organic framework incorporated solid electrolytes for superior proton conductivity and durability in fuel cells
Source: Royal Society of Chemistry journal article supplement (doi:10.1039/d4cp02196g), 2024-01-01
Supplement: d4cp02196g1.pdf [file d4cp02196g1.pdf]

## Supporting Information for

### Triazole-rich 3D Metal-organic Framework incorporated solid electrolyte for superior proton conductivity and durability in fuel cells

Madhuparna Ray<sup>1</sup>, Sunil K. Sethy<sup>2</sup>, Subrata Kumar Maiti<sup>1</sup>, Nasir Ali<sup>1</sup>, Amit C. Bhosale<sup>2</sup>, Prof. Y. S. Negi<sup>1</sup>, Sujay Chattopadhyay<sup>1\*</sup>

<sup>1</sup>Department of Polymer and Process Engineering, Indian Institute of Technology Roorkee, Roorkee, Uttarakhand, India 247667.

<sup>2</sup>Department of Hydro and Renewable Energy, Indian Institute of Technology Roorkee, Roorkee, Uttarakhand, India 247667

\*Corresponding author email: [sujay@pe.iitr.ac.in](mailto:sujay@pe.iitr.ac.in)

#### S1. Synthesis of SPEEK (Sulfonated Poly ether ether ketone)

SPEEK was synthesized by a previously reported procedure with by optimizing some conditions. At first 150 ml of concentrated sulfuric acid was added into a 4-neck glass reaction vessel. It was fitted with an overhead mechanical stirrer at set at 1200 rpm. Dried PEEK powder (10gm) was added in small portions into the container over the next 30 minutes. After dissolution of the powder, it was kept under stirring for 48 h at room temperature. Finally, the viscous solution was precipitated into chilled water and a white filament-like solid was obtained. It was washed repeatedly with water to neutralize the acid and oven dried for 24 h at 100°C. The Degree of sulfonation (DS) was determined by the formula using <sup>1</sup>H NMR spectroscopy as given in FIGURE S1.

$$\frac{n}{12 - 2n} = \frac{\Delta H_E}{\Sigma A_{H_{A,A',B,B',C,H}}} \quad 0 \leq n \leq 1 \quad (S1)$$

Degree of Sulfonation (%) =  $n \times 100$

Where, n denotes the sulfonation number,  $\Delta H_E$  is the calculated area of the NMR peak of hydrogen adjacent to SO<sub>3</sub>H group signal and  $\Sigma A_{H_{A, A', B, B', C, D}}$  is the total sum of the area of

NMR peak signals that corresponds to the other hydrogens in different chemical environment of the benzene ring, named  $H_{A, A', B, B', C, D}$ . The ratio between the number of  $H_E$  ( $n$ ) and the all the others aromatic hydrogens ( $12 - 2n$ ) per repeat unit is calculated from the ratio between the peak area of  $H_E$  signals, ( $\Delta H_E$ ). The degree of sulfonation obtained in this work is 70 %.

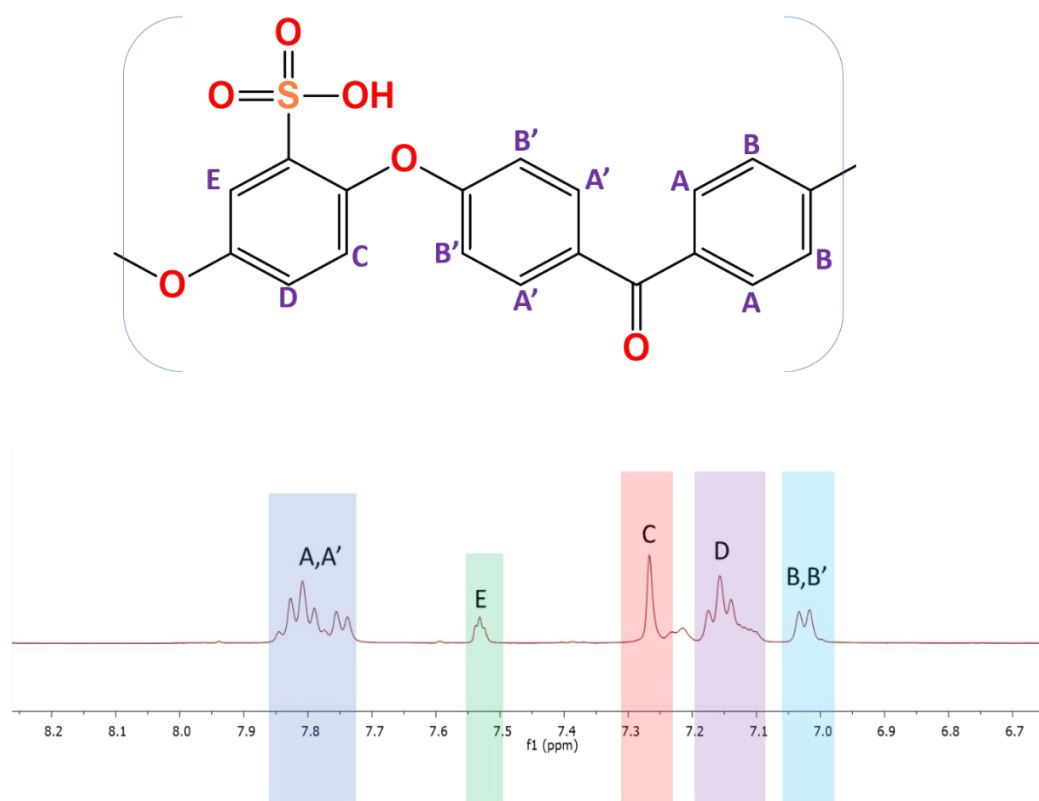

**Figure S1:** NMR spectrum of SPEEK

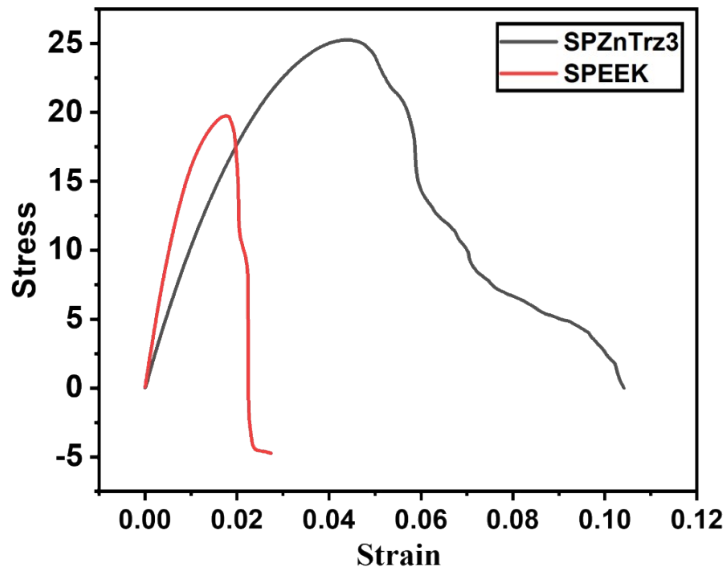

### Mechanical Behavior

**Figure S2:** The stress-strain curve of SPEEK and SPZnTrz3 was obtained using the UTM (INSTRON 5kN Model 3365) machine.

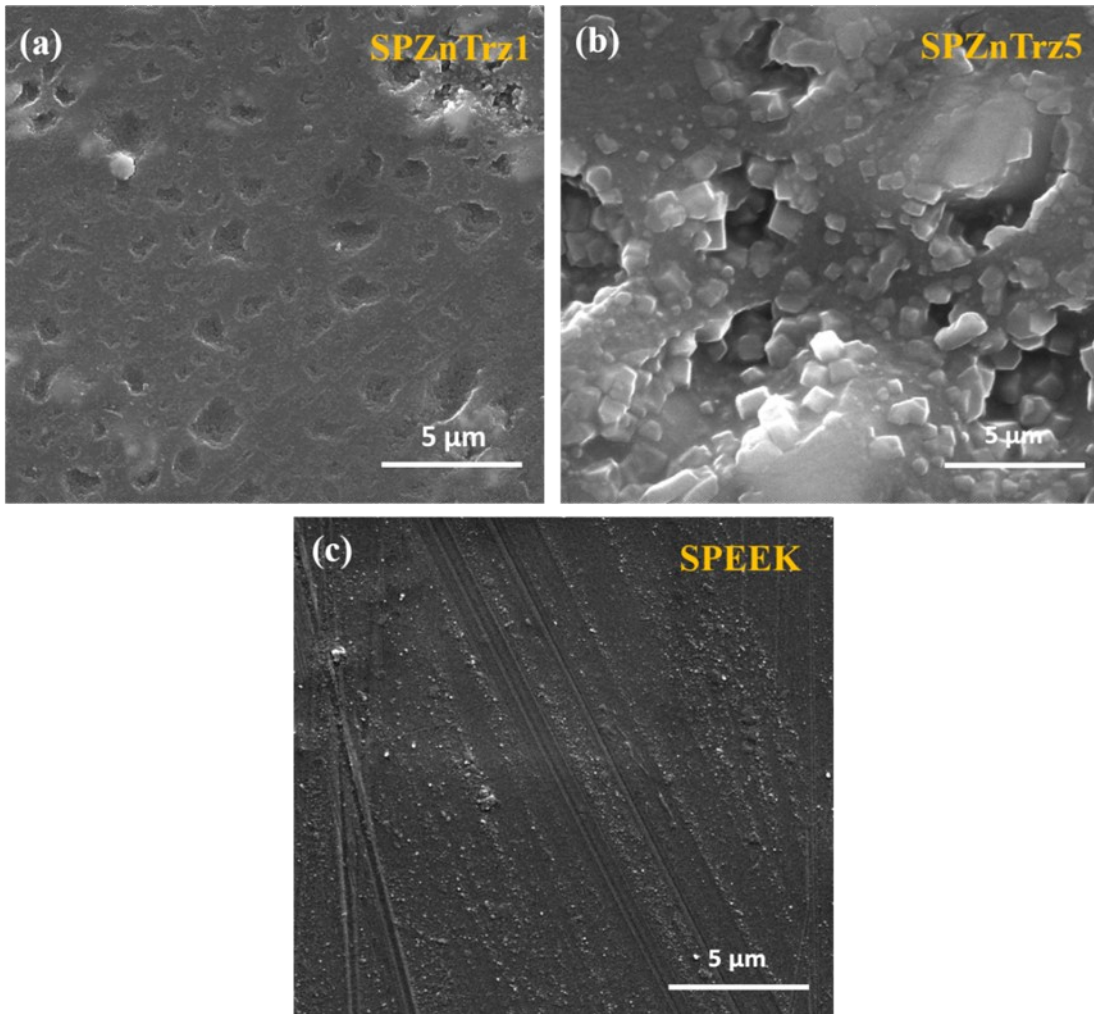

**Figure S3:** SEM images of SPZnTrz1(a), SPZnTrz5 (b), SPEEK (c).

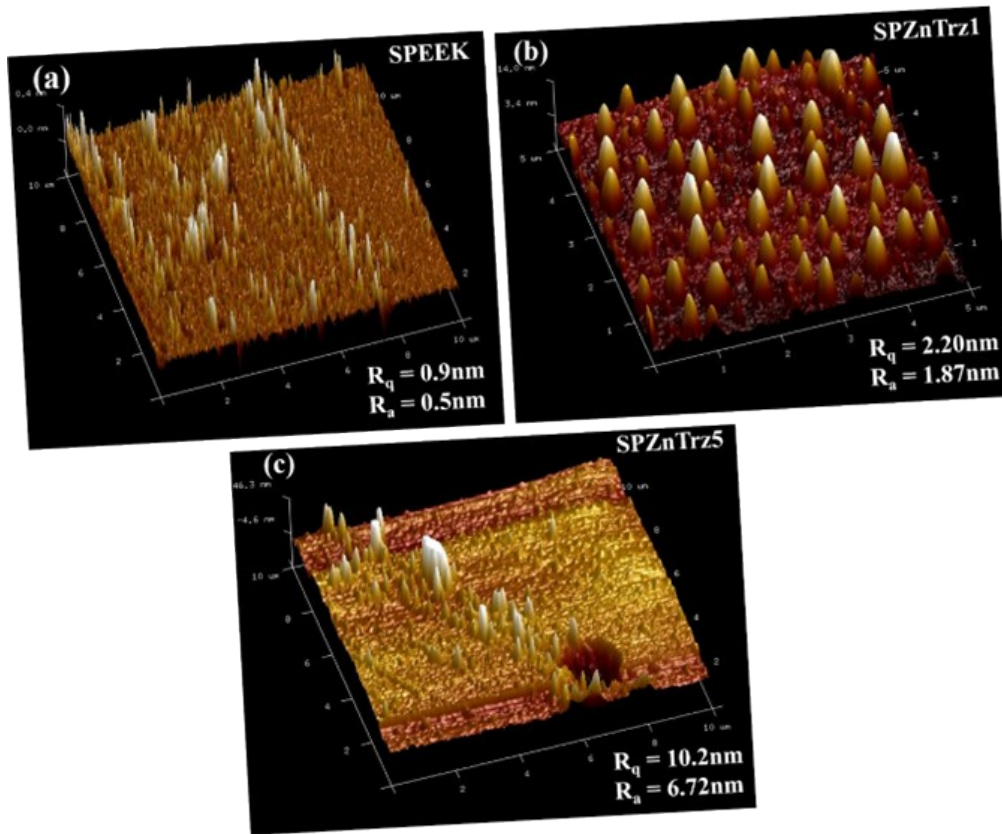

**Figure S4:** 3D AFM images of SPEEK(a), SPZnTrz1 (b), SPZnTrz5 (c).

## S2. Water Uptake

Membrane water uptake was measured by weight change following a 24-hour immersion in deionized water at from 20-80 °C temp. range. Next, the samples' weights were determined, and the following formula was used to estimate the water uptake (WU):

$$WU(\text{wt}\%) = \frac{W_{\text{wet}} - W_{\text{dry}}}{W_{\text{dry}}} \times 100\% \quad (\text{S2})$$

Where,  $W_{\text{dry}}$  and  $W_{\text{wet}}$  represent the membrane's measurements in the corresponding wet and dry circumstances.

## S3. IEC

The ion-exchange capabilities were evaluated by acid-base titration using phenolphthalein indicator. To replace the H<sup>+</sup> ions with sodium ions, the dried membrane samples were dipped in a 1M NaCl solution for 24 hours after the weight was recorded. The volume consumed was measured at the edge of the indicator's color shift when the solution containing the released

protons was titrated against NaOH (0.01 M) solution. The IEC of the membranes was then determined using the following formula:

$$IEC (mmol g^{-1}) = \frac{C_{NaOH} \times V_{NaOH}}{W_{dry}} \quad (S3)$$

where  $V_{NaOH}$  is the volume of NaOH solution consumed during the titration and  $C_{NaOH}$  is the titrant concentration. The final values were determined by averaging three measurements that were obtained simultaneously.

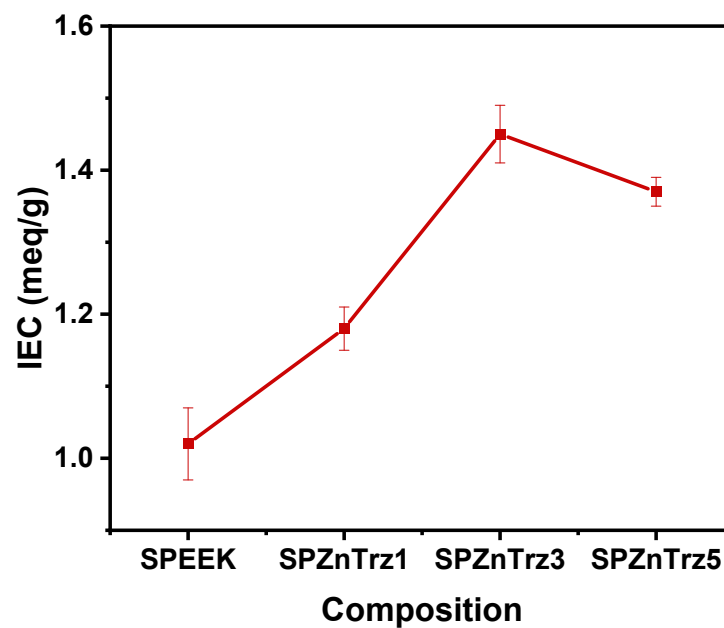

**Figure S5:** IEC graph of different membranes

#### S4. Swelling Ratio

The following equation was used to assess the difference in length between the initial dried membrane sample ( $L_{dry}$ ) and the hydrated sample ( $L_{wet}$ ) in order to determine the swelling ratio of the membrane at various temperatures:

$$SR (\%) = \frac{L_{wet} - L_{dry}}{L_{dry}} \times 100\% \quad (S4)$$

The final values of the test were determined by averaging three measurements that were obtained simultaneously.

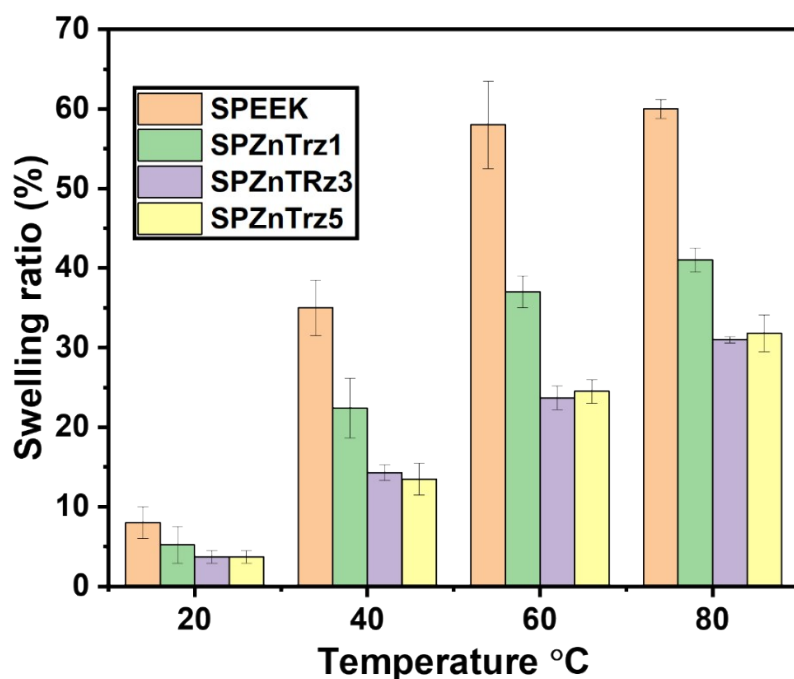

**Figure S6:** Swelling Ratio of the composite membranes with varying temperature.

### S5. Oxidative Stability

To study the antioxidant stability of the membranes, the weight of the dried samples was measured and then dipped in aliquots of hydrogen peroxide catalysed with  $\text{Fe}^{2+}$  salt (3 wt.%  $\text{H}_2\text{O}_2$  solution with 4 ppm  $\text{Fe}^{2+}$ ), to create hydroxyl radical environment for 12 h at 60 °C. The residual weight percentage was noted after the treatment and the difference in weight was calculated and plotted.

### S6. Proton Conductivity

Proton conductivity ( $\sigma$ ) of the samples was determined using the alternating current impedance technique (EIS) of two electrode systems at various temperatures and relative humidity levels 50 % between 0.1 and 100 kHz. Firstly, the membranes were cut into square shapes of appropriate size and kept overnight in 1(M)  $\text{H}_2\text{SO}_4$  solution. The membranes were wiped and air dried for 1 h and sandwiched between two steel electrodes and placed inside the cell as shown in FIGURE S7 equipped with heater, humidity and temperature sensors for conductivity measurement. The electrodes measure potential drop. The membranes resistances were measured at 30, 50, 65, 80, 100 ° C. To attain equilibrium and stability the cell was maintained for 20 mins at every measuring temperature before performing the EIS test. With the help of

the Metrohm Autolab Potentiostat/Galvanostat 2.0 (USA), the electrochemical characterization was completed, and the bulk resistance was noted from the Nyquist plots that were produced to calculate conductivity using equation 1.

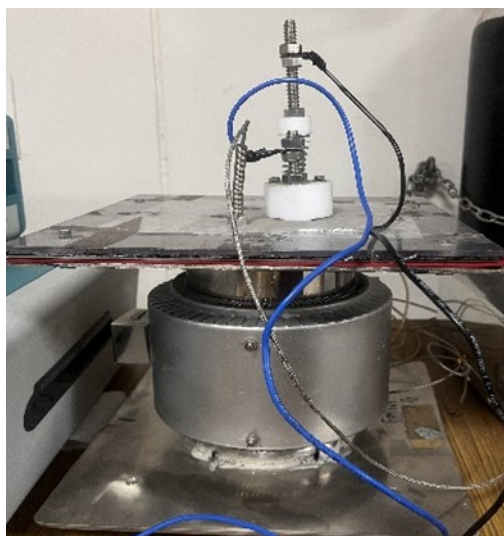

**Figure S7:** Conductivity cell used to generate Nyquist plots for proton conductivity of membranes by two probe method.



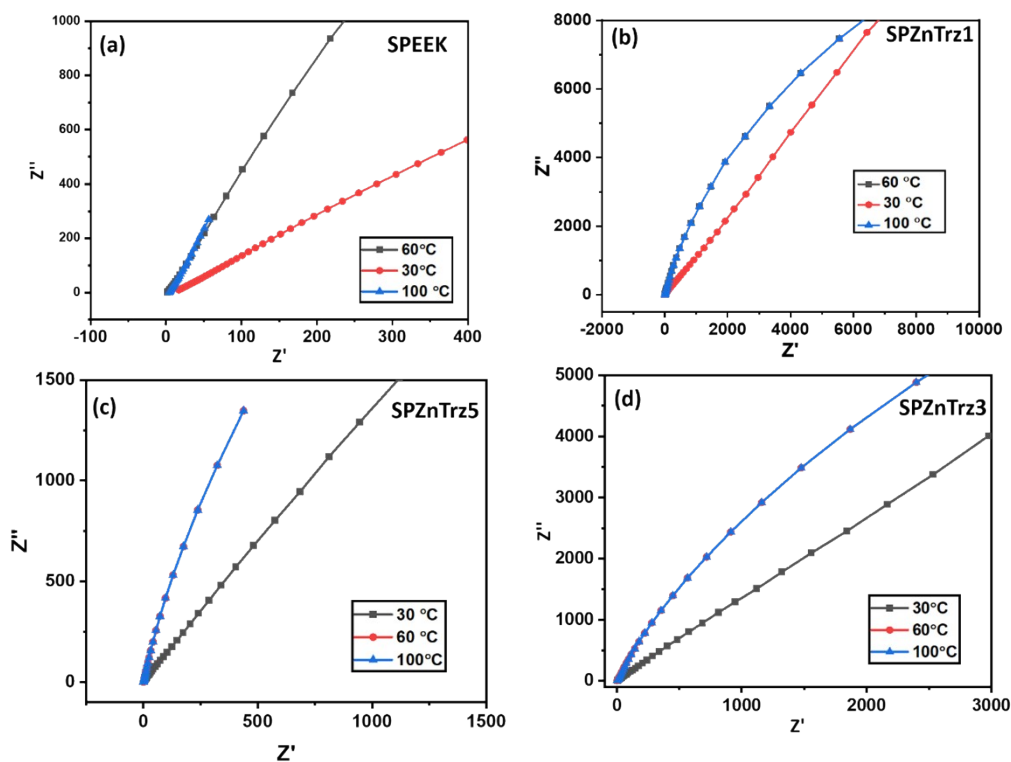

**Figure S8:** Nyquist plots obtained for membranes at different temperatures SPEEK (a), SPZnTrz1(b), SPZnTrz5(c), SPZnTrz3(d).

## S7. PEMFC testing (Single cell)

Membrane electrode assemblies (MEAs) were prepared by brush coating of the catalyst ink slurry on a gas diffusion layer. Teflonised carbon cloth was used in our MEA. The catalyst ink was formulated using commercial DURA-LYST® ST1110 20% Platinum on Vulcan XC72. A measured amount of Pt/C catalyst was taken in a glass vial and wetted with small amounts of distilled water to prevent its burning by isopropanol. After few minutes, required amount of isopropanol was added into the vial and sonicated for 30 mins in an ultrasonicator bath whose temperature was maintained at 20 °C. Into the dispersed ink, 5 % Nafion solution was used as binder ionomer to promote adhesion to the carbon cloth layer and sonicated for another 20 mins and coated (0.25 mg/cm<sup>2</sup> on anode side and 0.5 mg/cm<sup>2</sup> on the cathode side). After sufficient drying of the coated electrodes, a membrane was sandwiched between them and hot-pressed at 120 °C and 20 kg/cm<sup>2</sup> for 2 minutes to prepare the MEA. The MEA was fitted in a single cell assembly after activation as shown in FIGURE S9 and tested for performance and durability.

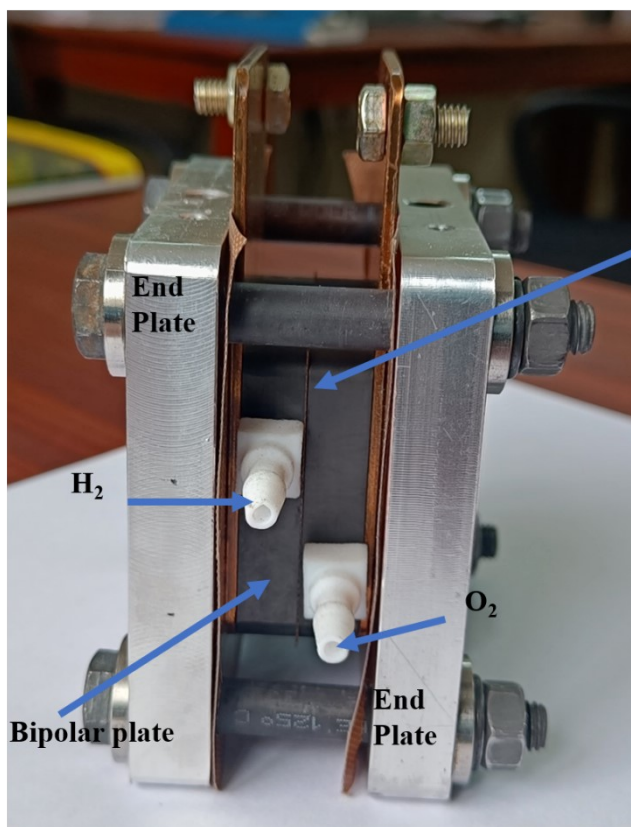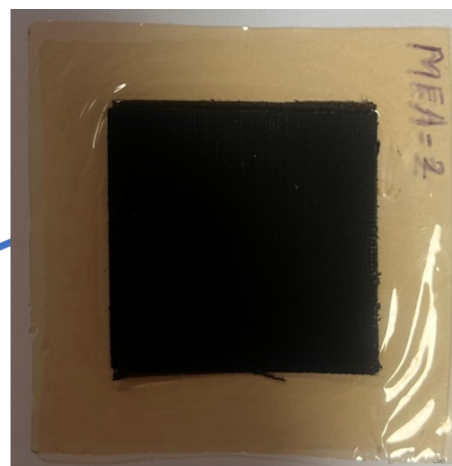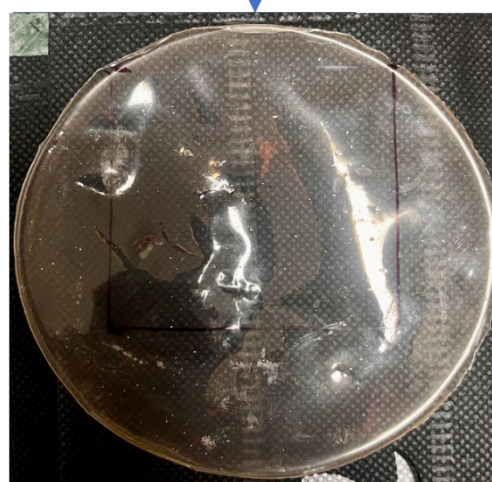

**Figure S9:** Single cell set up with H<sub>2</sub> and O<sub>2</sub> feed at 200 ml/min for MEA testing

**Table S1:** Comparative study of the developed composite membranes with recently published literatures.

| <b>Composite Membranes</b>                                      | <b>Conductivity (S cm<sup>-1</sup>)</b> | <b>Conditions</b>          | <b>Power density (mW·cm<sup>-2</sup>)</b> | <b>References</b> |
|-----------------------------------------------------------------|-----------------------------------------|----------------------------|-------------------------------------------|-------------------|
| Nafion@D1020+ Sulfonated MOF 808                                | 0.002                                   | 80°C, 35% RH               | -                                         | 1                 |
| SPEEK/S-UiO-66@GO-10                                            | 0.01                                    | 100°C, 40% RH              | -                                         | 2                 |
| Nafion-4PVIm (ATRP)                                             | 0.01<br>0.20                            | 80°C,20%RH<br>100°C ,40%RH | 210                                       | 3                 |
| Nafion + imidazole                                              | 0.04,<br>0.06                           | 80°C-70%RH<br>100°C-70%RH  | -                                         | 4                 |
| Nafion + imidazole functionalized mesoporous silica             | 0.007<br>0.0092                         | 80°C -0%RH<br>100°C-0%RH   | -                                         | 5                 |
| SPEEK + poly (ethylene glycol dimethacrylate-co-vinylimidazole) | 0.03                                    | 30°C-100%RH                | 104.5 mW                                  | 6                 |
| Speek + ZIF-67                                                  | 0.01                                    | 100°C                      | 49.77                                     | 7                 |
| SP-3PGO-5%                                                      | 0.07                                    | 90 °C, 100% RH             | 183.1                                     | 8                 |
| SPEEK/HPW@mGO                                                   | 0.005                                   | 65 °C, 40% RH              | 120.1                                     | 9                 |
| SPEEK@Ox-DBD-COF-SO <sub>3</sub> H                              | $3.87 \times 10^{-3}$                   | 90°C ,98% RH               | -                                         | 10                |
| SPEEK/SMOF/TEA2.5                                               | 0.14                                    | 80 °C,                     | -                                         | 11                |
| PEEK/S-SiO <sub>2</sub> /MOF-5                                  | $3.69 \times 10^{-3}$                   | 30°C                       | -                                         | 12                |
| CCNF/SPEEK                                                      | 0.05                                    | 20°C                       | -                                         | 13                |
| SPEEK/ZMix (ZIF-8, ZIF-67)                                      | 0.02                                    | 100 °C                     | -                                         | 14                |
| SPEEK/Zn-1H-1,2,4-Triazole based MOF (3 wt. %)                  | 0.04                                    | 80°C, 50% RH               | 231 mW/cm <sup>2</sup>                    | This work         |

## References

- (1) Patel, H. A.; Mansor, N.; Gadipelli, S.; Brett, D. J. L.; Guo, Z. Superacidity in Nafion/MOF Hybrid Membranes Retains Water at Low Humidity to Enhance Proton Conduction for Fuel Cells. *ACS Appl. Mater. Interfaces* **2016**, *8* (45), 30687–30691. <https://doi.org/10.1021/acsami.6b12240>.
- (2) Sun, H.; Tang, B.; Wu, P. Rational Design of S-UiO-66@GO Hybrid Nanosheets for Proton Exchange Membranes with Significantly Enhanced Transport Performance. *ACS Appl. Mater. Interfaces* **2017**, *9* (31), 26077–26087. <https://doi.org/10.1021/acsami.7b07651>.
- (3) Feng, K.; Liu, L.; Tang, B.; Li, N.; Wu, P. Nafion-Initiated ATRP of 1-Vinylimidazole for Preparation of Proton Exchange Membranes. *ACS Appl. Mater. Interfaces* **2016**, *8* (18), 11516–11525. <https://doi.org/10.1021/acsami.6b02248>.
- (4) Fu, Y.-Z.; Manthiram, A. Nafion–Imidazole–H[Sub 3]PO[Sub 4] Composite Membranes for Proton Exchange Membrane Fuel Cells. *J. Electrochem. Soc.* **2007**, *154* (1), B8. <https://doi.org/10.1149/1.2364850>.
- (5) Amiin, I. S.; Li, W.; Wang, G.; Tu, Z.; Tang, H.; Pan, M.; Zhang, H. Toward Anhydrous Proton Conductivity Based on Imidazole Functionalized Mesoporous Silica/Nafion Composite Membranes. *Electrochim. Acta* **2015**, *160*, 185–194. <https://doi.org/10.1016/J.ELECTACTA.2015.02.070>.
- (6) Wang, J.; Yue, X.; Zhang, Z.; Yang, Z.; Li, Y.; Zhang, H.; Yang, X.; Wu, H.; Jiang, Z. Enhancement of Proton Conduction at Low Humidity by Incorporating Imidazole Microcapsules into Polymer Electrolyte Membranes. *Adv. Funct. Mater.* **2012**, *22* (21), 4539–4546. <https://doi.org/10.1002/ADFM.201201436>.
- (7) Barjola, A.; Reyes-Rodríguez, J. L.; Solorza-Feria, O.; Giménez, E.; Compañ, V. Novel SPEEK-ZIF-67 Proton Exchange Nanocomposite Membrane for PEMFC Application at Intermediate Temperatures. *Ind. Eng. Chem. Res.* **2021**, *60* (25), 9107–9118. <https://doi.org/10.1021/acs.iecr.1c01780>.
- (8) Liu, Y.; Wu, W.; Li, P.; Lin, J.; Yang, Z.; Wang, J. Constructing Long-Range Transfer Pathways with Ordered Acid–Base Pairs for Highly Enhanced Proton Conduction. *ACS Appl. Mater. Interfaces* **2019**, *11* (10), 9964–9973. <https://doi.org/10.1021/acsami.8b21081>.
- (9) Peng, Q.; Li, Y.; Qiu, M.; Shi, B.; He, X.; Fan, C.; Mao, X.; Wu, H.; Jiang, Z. Enhancing Proton Conductivity of Sulfonated Poly(Ether Ether Ketone)-Based Membranes by Incorporating Phosphotungstic-Acid-Coupled Graphene Oxide. *Cite This Ind. Eng. Chem. Res* **2021**, *60*, 4460–4470. <https://doi.org/10.1021/acs.iecr.1c00003>.
- (10) Yang, Z.; Chen, P.; Hao, W.; Xie, Z.; Feng, Y.; Xing, G.; Chen, L. Sulfonated 2D Covalent Organic Frameworks for Efficient Proton Conduction. *Chem. - A Eur. J.* **2021**, *27* (11), 3817–3822. <https://doi.org/10.1002/CHEM.202004727>.
- (11) da Trindade, L. G.; Borba, K. M. N.; Zanchet, L.; Lima, D. W.; Trench, A. B.; Rey, F.; Diaz, U.; Longo, E.; Bernardo-Gusmão, K.; Martini, E. M. A. SPEEK-Based Proton Exchange Membranes Modified with MOF-Encapsulated Ionic Liquid. *Mater. Chem. Phys.* **2019**, *236* (April). <https://doi.org/10.1016/j.matchemphys.2019.121792>.

- (12) Bisht, S.; Balaguru, S.; Ramachandran, S. K.; Gangasalam, A.; Kweon, J. Proton Exchange Composite Membranes Comprising SiO<sub>2</sub>, Sulfonated SiO<sub>2</sub>, and Metal–Organic Frameworks Loaded in SPEEK Polymer for Fuel Cell Applications. *J. Appl. Polym. Sci.* **2021**, *138* (22). <https://doi.org/10.1002/APP.50530>.
- (13) Di, Y.; Yang, W.; Li, X.; Zhao, Z.; Wang, M.; Dai, J. Preparation and Characterization of Continuous Carbon Nanofiber-Supported SPEEK Composite Membranes for Fuel Cell Application. *RSC Adv.* **2014**, *4* (94), 52001–52007. <https://doi.org/10.1039/C4RA06976E>.
- (14) Barjola, A.; Escorihuela, J.; Andrio, A.; Giménez, E.; Compañ, V. Enhanced Conductivity of Composite Membranes Based on Sulfonated Poly(Ether Ether Ketone) (SPEEK) with Zeolitic Imidazolate Frameworks (ZIFs). *Nanomater.* *2018*, *Vol. 8*, Page 1042 **2018**, *8* (12), 1042. <https://doi.org/10.3390/NANO8121042>.
